# Supplementary material for: In Silico Modeling of Itk Activation Kinetics in Thymocytes Suggests Competing Positive and Negative IP4 Mediated Feedbacks Increase Robustness
Source: PLoS One. 2013 Sep 16;8(9):e73937. doi: 10.1371/journal.pone.0073937 (PMC3774804; doi:10.1371/journal.pone.0073937)
Supplement: Table S15 — Reactions and rate constants for model M7lck. (DOCX) [file pone.0073937.s038.docx]

**Table S15: Reactions and rate constants for model M7lck.**

| **Reactions** | **kon** (μM-1s-1) | **koff** (s-1) | **KD** (μM) | **kcat** (μM-1s-1) | **kact** (s-1) | **kdeact** (s-1) |
| --- | --- | --- | --- | --- | --- | --- |
|  | 2.5 10-4 | 0.01 | 40 |  |  |  |
|  | 0.01 | 0.1 | 10 |  |  |  |
|  | 2.5 10-3 | 0.01 | 4 |  |  |  |
|  | 2.5 10-3 | 0.01 | 4 |  |  |  |
|  | 0.01 | 0.1 | 10 |  |  |  |
|  | 0.1 | 0.1 | 1 |  |  |  |
|  |  |  |  | 1.5 10-4 |  |  |
|  |  |  |  | 1.5 10-4 |  |  |
|  |  |  |  | 1.5 10-4 |  |  |
|  |  |  |  |  | 0.3 | 0.09 |
|  |  |  |  |  | 0.3 | 0.09 |
|  |  |  |  |  | 0.3 | 0.09 |
|  |  | 0.1 |  |  |  |  |
|  | 2.5 10-3 | 0.01 | 4 |  |  |  |
|  | 2.5 10-4 | 0.01 | 40 |  |  |  |
|  | 2.5 10-4 | 0.01 | 40 |  |  |  |
